# Supplementary material for: Transmission and Antibiotic Resistance of Achromobacter in Cystic Fibrosis
Source: PubMed Central journal article supplement (PMC8092725; doi:10.1128/jcm.02911-20), 2021-03-19
Supplement: JCM.02911-20-s0001.pdf [file JCM.02911-20-s0001.pdf]

## Supplementary information

**Table S1.** List of all patients attending Copenhagen CF Center who were infected with *Achromobacter* in 2002–2018.

| Patient ID | Chronic | Number of isolates taken | Number of isolates sequenced | Date of the first isolate* | Species as defined by MALDI-TOF/API N20 |
|------------|---------|--------------------------|------------------------------|----------------------------|-----------------------------------------|
| P1700      | No      | 2                        | 1                            | 2013                       | <i>A. xylosoxidans</i>                  |
| P4600      | No      | 10                       | 0                            | 2010                       | <i>A. xylosoxidans</i>                  |
| P3901      | Yes     | 127                      | 0                            | 2002                       | <i>A. xylosoxidans</i>                  |
| P4501      | No      | 8                        | 0                            | 2002                       | <i>A. xylosoxidans/A. insolitus</i>     |
| P7201      | Yes     | 68                       | 0                            | 2009                       | <i>A. xylosoxidans</i>                  |
| P0802      | Yes     | 120                      | 2                            | 2002                       | <i>A. xylosoxidans</i>                  |
| P1102      | No      | 1                        | 0                            | 2005                       | <i>A. xylosoxidans</i>                  |
| P2202      | No      | 1                        | 1                            | 2011                       | <i>A. xylosoxidans</i>                  |
| P2802      | No      | 5                        | 0                            | 2002                       | <i>A. denitrificans</i>                 |
| P3602      | No      | 4                        | 0                            | 2002                       | <i>A. xylosoxidans/A. denitrificans</i> |
| P5602      | Yes     | 100                      | 0                            | 2002                       | <i>A. xylosoxidans</i>                  |
| P5802      | No      | 5                        | 0                            | 2004                       | <i>A. xylosoxidans</i>                  |
| P6402      | Yes     | 5                        | 1                            | 2017                       | <i>A. xylosoxidans</i>                  |
| P6602      | Yes     | 134                      | 0                            | 2007                       | <i>A. xylosoxidans</i>                  |
| P7402      | No      | 4                        | 1                            | 2014                       | <i>A. xylosoxidans</i>                  |
| P9902      | Yes     | 137                      | 3                            | 2002                       | <i>A. xylosoxidans</i>                  |
| P0603      | No      | 24                       | 2                            | 2002                       | <i>A. xylosoxidans</i>                  |
| P0703      | Yes     | 18                       | 2                            | 2011                       | <i>A. xylosoxidans</i>                  |
| P0803      | Yes     | 58                       | 3                            | 2002                       | <i>A. xylosoxidans</i>                  |
| P0903      | Yes     | 111                      | 1                            | 2002                       | <i>A. xylosoxidans/A. denitrificans</i> |
| P1703      | Yes     | 40                       | 1                            | 2010                       | <i>A. xylosoxidans</i>                  |
| P1903      | Yes     | 166                      | 4                            | 2002                       | <i>A. xylosoxidans</i>                  |
| P2103      | No      | 3                        | 1                            | 2016                       | <i>A. xylosoxidans</i>                  |
| P3203      | Yes     | 238                      | 4                            | 2002                       | <i>A. xylosoxidans</i>                  |
| P3403      | Yes     | 113                      | 2                            | 2002                       | <i>A. xylosoxidans</i>                  |
| P3503      | Yes     | 79                       | 0                            | 2002                       | <i>A. xylosoxidans</i>                  |
| P4003      | Yes     | 119                      | 0                            | 2002                       | <i>A. xylosoxidans</i>                  |
| P4203      | Yes     | 49                       | 2                            | 2012                       | <i>A. xylosoxidans</i>                  |
| P4303      | No      | 4                        | 0                            | 2010                       | <i>A. denitrificans</i>                 |
| P4703      | Yes     | 157                      | 3                            | 2002                       | <i>A. xylosoxidans</i>                  |
| P4903      | No      | 3                        | 0                            | 2002                       | <i>A. denitrificans</i>                 |
| P5103      | No      | 7                        | 1                            | 2015                       | <i>A. xylosoxidans</i>                  |
| P5303      | Yes     | 221                      | 3                            | 2003                       | <i>A. xylosoxidans</i>                  |
| P5803      | Yes     | 46                       | 1                            | 2011                       | <i>A. xylosoxidans</i>                  |
| P5903      | No      | 3                        | 0                            | 2003                       | <i>A. xylosoxidans</i>                  |
| P6203      | No      | 4                        | 4                            | 2006                       | <i>A. xylosoxidans</i>                  |
| P6703      | No      | 2                        | 0                            | 2012                       | <i>A. xylosoxidans</i>                  |

|       |     |     |   |      |                                              |
|-------|-----|-----|---|------|----------------------------------------------|
| P6803 | No  | 6   | 0 | 2002 | A. xylooxidans                               |
| P7003 | Yes | 147 | 0 | 2002 | A. xylooxidans                               |
| P7403 | Yes | 74  | 0 | 2008 | A. xylooxidans                               |
| P7603 | Yes | 98  | 4 | 2008 | A. xylooxidans                               |
| P7703 | Yes | 9   | 2 | 2017 | A. xylooxidans                               |
| P8003 | Yes | 52  | 0 | 2004 | A. xylooxidans                               |
| P8103 | No  | 2   | 0 | 2004 | A. xylooxidans                               |
| P8603 | No  | 30  | 2 | 2002 | A. xylooxidans                               |
| P8703 | Yes | 60  | 1 | 2003 | A. denitrificans                             |
| P8903 | No  | 1   | 0 | 2005 | A. xylooxidans                               |
| P9203 | Yes | 38  | 3 | 2011 | A. xylooxidans                               |
| P9403 | Yes | 125 | 3 | 2004 | A. xylooxidans                               |
| P9503 | Yes | 93  | 3 | 2007 | A. xylooxidans                               |
| P9603 | Yes | 128 | 3 | 2003 | A. xylooxidans                               |
| P9803 | No  | 1   | 0 | 2010 | A. denitrificans                             |
| P0004 | No  | 2   | 0 | 2014 | A. xylooxidans                               |
| P0104 | No  | 9   | 0 | 2006 | A. xylooxidans                               |
| P0604 | No  | 3   | 1 | 2003 | A. xylooxidans                               |
| P0904 | Yes | 53  | 0 | 2009 | A. xylooxidans                               |
| P1004 | Yes | 147 | 0 | 2009 | A. xylooxidans                               |
| P1304 | Yes | 7   | 0 | 2002 | A. xylooxidans                               |
| P1504 | Yes | 32  | 0 | 2008 | A. xylooxidans                               |
| P1704 | Yes | 9   | 2 | 2002 | A. xylooxidans                               |
| P1804 | No  | 2   | 0 | 2002 | A. xylooxidans                               |
| P2104 | No  | 1   | 0 | 2011 | A. xylooxidans                               |
| P3004 | Yes | 3   | 1 | 2007 | A. xylooxidans/A. insolitus                  |
| P3104 | No  | 5   | 0 | 2008 | A. xylooxidans                               |
| P3504 | No  | 8   | 2 | 2013 | A. xylooxidans                               |
| P3704 | Yes | 175 | 3 | 2003 | A. xylooxidans                               |
| P4104 | No  | 3   | 1 | 2014 | A. xylooxidans                               |
| P4704 | No  | 5   | 0 | 2011 | A. xylooxidans                               |
| P4904 | Yes | 23  | 0 | 2008 | A. xylooxidans                               |
| P5204 | No  | 4   | 1 | 2007 | A. xylooxidans                               |
| P5604 | Yes | 48  | 2 | 2007 | A. xylooxidans                               |
| P6004 | Yes | 80  | 2 | 2007 | A. xylooxidans                               |
| P6104 | No  | 3   | 0 | 2004 | A. xylooxidans/A. denitrificans              |
| P6604 | Yes | 64  | 2 | 2007 | A. xylooxidans                               |
| P6804 | No  | 2   | 1 | 2006 | A. xylooxidans                               |
| P7204 | No  | 3   | 0 | 2006 | A. xylooxidans                               |
| P8004 | No  | 8   | 0 | 2010 | A. xylooxidans/A. denitrificans/A. insolitus |
| P8104 | No  | 1   | 1 | 2011 | A. xylooxidans                               |
| P8204 | No  | 12  | 0 | 2003 | A. xylooxidans                               |
| P8404 | Yes | 61  | 3 | 2013 | A. xylooxidans                               |
| P8504 | No  | 6   | 2 | 2014 | Achromobacter/A. insolitus                   |
| P8704 | No  | 1   | 0 | 2010 | A. xylooxidans                               |

|       |     |     |   |      |                                 |
|-------|-----|-----|---|------|---------------------------------|
| P9604 | No  | 5   | 0 | 2005 | A. xylooxidans                  |
| P9704 | Yes | 86  | 2 | 2010 | A. xylooxidans/A. denitrificans |
| P0105 | No  | 1   | 0 | 2005 | A. xylooxidans                  |
| P0305 | No  | 1   | 0 | 2006 | A. denitrificans                |
| P1005 | No  | 2   | 0 | 2011 | A. xylooxidans                  |
| P1305 | Yes | 14  | 0 | 2002 | A. xylooxidans                  |
| P1605 | No  | 2   | 0 | 2011 | A. insolitus                    |
| P1705 | Yes | 111 | 3 | 2007 | A. xylooxidans                  |
| P2005 | No  | 4   | 1 | 2017 | A. xylooxidans                  |
| P2605 | No  | 4   | 1 | 2016 | A. xylooxidans/A. insolitus     |
| P6005 | No  | 3   | 0 | 2014 | A. xylooxidans                  |
| P6905 | No  | 3   | 0 | 2014 | A. xylooxidans                  |
| P8605 | No  | 8   | 2 | 2013 | A. xylooxidans                  |
| P0610 | Yes | 71  | 2 | 2011 | A. xylooxidans                  |
| P5611 | No  | 1   | 1 | 2017 | A. xylooxidans                  |
| P8511 | Yes | 10  | 1 | 2017 | A. xylooxidans                  |
| P3205 | No  | 2   | 0 | 2016 | A. xylooxidans                  |
| P1512 | No  | 19  | 0 | 2016 | A. xylooxidans                  |
| P2206 | No  | 1   | 0 | 2018 | A. xylooxidans                  |
| P2905 | No  | 2   | 0 | 2015 | A. xylooxidans                  |
| P8705 | No  | 1   | 0 | 2018 | A. xylooxidans                  |
| P3103 | No  | 4   | 0 | 2018 | A. xylooxidans                  |

\* In some cases where the first isolate date is 2002, it is the first documented isolate and not the first isolate taken from the patient (there are no records of isolates taken prior to 2002)

**Table S2.** Information about isolate sequencing, alignment and assembly quality.

| Isolate                   | Number of reads | Percent of positions with Q-score $\geq$ 30 in R1 | Percent of positions with Q-score $\geq$ 30 in R2 | Average alignment coverage | Percent of the reference genome positions considered in the analysis (coverage in all samples $\geq$ 10x) | Number of scaffolds in assemblies | Scaffold N50 |
|---------------------------|-----------------|---------------------------------------------------|---------------------------------------------------|----------------------------|-----------------------------------------------------------------------------------------------------------|-----------------------------------|--------------|
| P1700_04112013_AX03DK01-0 | 1236967         | 91.26                                             | 66.71                                             | 44.9702                    | NA                                                                                                        | 160                               | 184708       |
| P0802_04042005_AX02DK07-0 | 1921055         | 70.96                                             | 52.25                                             | 53.1081                    | 74.78                                                                                                     | 202                               | 146329       |
| P0802_18012008_AX02DK07-0 | 1473581         | 73.63                                             | 44.65                                             | 40.5247                    | 74.78                                                                                                     | 153                               | 158164       |
| P2202_04012011_AX04DK01-0 | 1064406         | 76.75                                             | 28.58                                             | 24.2448                    | NA                                                                                                        | 190                               | 332669       |
| P6402_27032017_AX03DK02-0 | 679888          | 77.38                                             | 42.16                                             | 25.1953                    | 83.41                                                                                                     | 224                               | 73783        |
| P7402_26022014_AX01DK02-0 | 1203047         | 88.87                                             | 74.3                                              | 61.8133                    | NA                                                                                                        | 191                               | 134541       |
| P9902_01011996_AX02DK06-0 | 1231124         | 89.39                                             | 73.4                                              | 53.5014                    | 71.80                                                                                                     | 199                               | 149072       |
| P9902_01032004_AX02DK06-0 | 350677          | 80.32                                             | 57.8                                              | 15.5908                    | 71.80                                                                                                     | 257                               | 44696        |
| P9902_26012009_AX02DK06-0 | 1062546         | 89.84                                             | 73.41                                             | 46.3418                    | 71.80                                                                                                     | 148                               | 146618       |
| P0603_03012007_AX02DK07-0 | 1231059         | 81.22                                             | 60.89                                             | 39.8374                    | 74.78                                                                                                     | 216                               | 102583       |
| P0603_08102003_AX02DK07-0 | 1313583         | 83.18                                             | 57.2                                              | 43.6965                    | 74.78                                                                                                     | 235                               | 131247       |
| P0703_07082013_AX03DK02-0 | 1460584         | 89.01                                             | 75.85                                             | 63.1056                    | 83.41                                                                                                     | 394                               | 141080       |
| P0703_23092011_AX03DK05-0 | 1046818         | 88.99                                             | 72.38                                             | 47.5802                    | NA                                                                                                        | 299                               | 107564       |

|                           |         |       |       |         |       |     |        |
|---------------------------|---------|-------|-------|---------|-------|-----|--------|
| P0803_01012000_AX03DK06-0 | 1508023 | 91.06 | 74.17 | 52.6904 | 86.20 | 117 | 132136 |
| P0803_26042014_AX03DK06-0 | 1146138 | 90.71 | 67.3  | 37.7869 | 86.20 | 381 | 97234  |
| P0803_27042007_AX03DK06-0 | 1280237 | 90.69 | 71.51 | 43.9816 | 86.20 | 165 | 141101 |
| P0903_06012012_AX03DK07-0 | 886554  | 86.69 | 70.53 | 38.8576 | NA    | 149 | 122906 |
| P1703_16032010_AX03DK08-0 | 994577  | 71.9  | 27.64 | 33.2292 | NA    | 231 | 99435  |
| P1903_01011996_AX03DK09-0 | 865492  | 89.15 | 77.79 | 36.574  | 86.34 | 192 | 104382 |
| P1903_01092016_AX01DK01-0 | 960654  | 89.87 | 75.55 | 45.4156 | 80.85 | 319 | 85559  |
| P1903_16122011_AX01DK01-0 | 1006102 | 90.2  | 74.36 | 47.0012 | 80.85 | 191 | 79969  |
| P1903_27032006_AX03DK09-0 | 997956  | 89.52 | 73.05 | 41.5704 | 86.34 | 158 | 124447 |
| P2103_11042016_AX03DK10-0 | 694537  | 93.89 | 81.78 | 31.5362 | NA    | 171 | 125703 |
| P3203_01011997_AX03DK11-0 | 1655094 | 88.06 | 75.6  | 74.9065 | 85.20 | 185 | 128643 |
| P3203_07022014_AX03DK11-0 | 755267  | 83.8  | 59.6  | 34.0323 | 85.20 | 171 | 75846  |
| P3203_18042005_AX03DK11-0 | 1660733 | 87.62 | 76.14 | 74.6272 | 85.20 | 180 | 146696 |
| P3203_19092012_AX03DK11-0 | 1611854 | 87.28 | 73.2  | 74.6853 | 85.20 | 191 | 129689 |
| P3403_06102003_AX01DK01-0 | 1311320 | 91.58 | 73.46 | 52.5772 | 80.85 | 172 | 106229 |
| P3403_27022012_AX01DK01-0 | 1445803 | 91.44 | 74.36 | 56.2188 | 80.85 | 191 | 92936  |
| P4203_09102012_AX03DK12-0 | 1234301 | 91.23 | 72.05 | 47.1957 | NA    | 204 | 133994 |
| P4203_09122014_AX01DK01-0 | 1184740 | 90.54 | 72.61 | 48.9751 | 80.85 | 197 | 85654  |
| P4703_01012000_AX03DK13-0 | 1365747 | 92.09 | 79.39 | 48.844  | 73.83 | 252 | 115850 |
| P4703_16022007_AX03DK13-0 | 1253012 | 92.28 | 78.16 | 44.8413 | 73.83 | 281 | 129622 |
| P4703_18022015_AX01DK01-0 | 1183348 | 90.65 | 80.26 | 56.9179 | 80.85 | 202 | 85301  |
| P5103_07102016_AX02DK09-0 | 1584763 | 89.27 | 72.24 | 70.8556 | NA    | 137 | 131939 |
| P5303_07102016_AX01DK01-0 | 919446  | 89.84 | 75.36 | 42.588  | 80.85 | 173 | 85489  |
| P5303_14012004_AX01DK01-0 | 982584  | 89.99 | 73.89 | 45.3862 | 80.85 | 315 | 70232  |
| P5303_14102009_AX01DK01-0 | 955166  | 88.99 | 78.27 | 45.1233 | 80.85 | 183 | 92674  |
| P5803_17012011_AX03DK14-0 | 919088  | 86.25 | 73.1  | 41.9749 | NA    | 126 | 142009 |
| P6203_01012000_AX03DK15-0 | 1298566 | 90.18 | 74.85 | 52.0941 | 79.32 | 295 | 116827 |
| P6203_02102006_AX03DK16-0 | 1114110 | 88.3  | 64.66 | 47.1393 | 81.83 | 232 | 192141 |
| P6203_12122015_AX02DK08-0 | 765735  | 91.86 | 83.36 | 36.3228 | NA    | 283 | 73708  |
| P6203_24092018_AX02DK07-0 | 663419  | 91.3  | 84.03 | 24.2781 | 74.78 | 203 | 82444  |
| P7603_01011997_AX04DK02-0 | 1284557 | 89.53 | 80.92 | 39.6519 | NA    | 92  | 282949 |
| P7603_04042014_AX03DK16-0 | 1343593 | 81.1  | 56.88 | 55.7502 | 81.83 | 150 | 139100 |
| P7603_18022011_AX03DK16-0 | 615534  | 77.71 | 57.14 | 26.5182 | 81.83 | 241 | 86498  |
| P7603_19112008_AX03DK16-0 | 803956  | 77.41 | 64.51 | 34.1174 | 81.83 | 134 | 112119 |
| P7703_16032018_AX01DK01-0 | 1177983 | 88.37 | 77.21 | 55.3489 | 80.85 | 363 | 86775  |
| P7703_19012017_AX01DK01-0 | 1217025 | 88.12 | 72.22 | 53.8748 | 80.85 | 244 | 88018  |
| P8603_03072008_AX03DK17-0 | 1403388 | 72.45 | 44.68 | 48.9187 | 85.67 | 322 | 168641 |
| P8603_27082014_AX03DK17-0 | 1423853 | 73.85 | 46.54 | 49.8143 | 85.67 | 183 | 162600 |
| P8703_15032017_AX01DK01-0 | 1338572 | 77.62 | 52.07 | 50.5233 | 80.85 | 256 | 85370  |
| P9203_01012000_AX02DK03-0 | 976984  | 90.55 | 78.17 | 44.4988 | NA    | 225 | 124753 |
| P9203_08042016_AX03DK18-0 | 1179899 | 91.93 | 79.26 | 53.8671 | 84.40 | 146 | 167726 |
| P9203_13122011_AX03DK18-0 | 763636  | 86.69 | 76.25 | 34.4134 | 84.40 | 172 | 102487 |
| P9403_05092016_AX03DK19-0 | 1068025 | 91.47 | 79.46 | 47.3566 | 86.36 | 163 | 119797 |
| P9403_29092004_AX03DK19-0 | 1126849 | 91.38 | 79.21 | 51.1977 | 86.36 | 210 | 153581 |
| P9403_30102009_AX03DK19-0 | 1205610 | 92.18 | 77.46 | 52.8502 | 86.36 | 174 | 134733 |
| P9503_02012007_AX01DK01-0 | 1393880 | 85.72 | 76.54 | 68.2448 | 80.85 | 416 | 103435 |

|                           |         |       |       |         |       |     |        |
|---------------------------|---------|-------|-------|---------|-------|-----|--------|
| P9503_04032011_AX01DK01-0 | 796367  | 87.06 | 71.93 | 40.0553 | 80.85 | 384 | 73675  |
| P9503_27052014_AX01DK01-0 | 1637852 | 88.01 | 76.13 | 77.5176 | 80.85 | 189 | 100034 |
| P9603_01042014_AX01DK01-0 | 1140742 | 88.54 | 76.12 | 55.1843 | 80.85 | 266 | 74400  |
| P9603_28102003_AX01DK01-0 | 1508188 | 87.41 | 72.37 | 74.6452 | 80.85 | 166 | 114598 |
| P9603_28112008_AX01DK01-0 | 1568086 | 88.98 | 76.26 | 73.1531 | 80.85 | 246 | 106324 |
| P0604_30122003_AX03DK20-0 | 1708579 | 89.73 | 73.37 | 74.2587 | NA    | 276 | 186108 |
| P1704_01011999_AX03DK21-0 | 439827  | 74.88 | 17.6  | 16.1498 | 68.86 | 370 | 61153  |
| P1704_07022011_AX03DK21-0 | 2118817 | 73.61 | 26.55 | 61.7486 | 68.86 | 132 | 137960 |
| P3004_24042007_AX03DK22-0 | 1523025 | 85.33 | 65.92 | 52.6253 | NA    | 117 | 162189 |
| P3504_09012015_AX03DK23-0 | 1659379 | 83.64 | 60.97 | 65.7022 | 87.97 | 174 | 140329 |
| P3504_20122013_AX03DK23-0 | 1511020 | 84.4  | 58.7  | 58.9443 | 87.97 | 172 | 119989 |
| P3704_08022008_AX01DK01-0 | 1196741 | 90.43 | 74.28 | 54.9169 | 80.85 | 506 | 84063  |
| P3704_26112003_AX01DK01-0 | 1357889 | 90.41 | 71.6  | 62.6729 | 80.85 | 358 | 89603  |
| P3704_27062014_AX01DK01-0 | 1377576 | 90.69 | 73.11 | 61.8987 | 80.85 | 234 | 126894 |
| P4104_02122014_AX01DK03-0 | 1337224 | 91.62 | 68.6  | 53.63   | NA    | 137 | 124338 |
| P5204_15082016_AX03DK03-0 | 814201  | 82.8  | 81.13 | 31.1042 | NA    | 280 | 104233 |
| P5604_07102016_AX01DK01-0 | 1155400 | 90.13 | 80.88 | 56.5172 | 80.85 | 185 | 79929  |
| P5604_28082007_AX01DK01-0 | 1242997 | 91.95 | 76.33 | 58.8504 | 80.85 | 248 | 114652 |
| P6004_19062007_AX01DK01-0 | 891956  | 88.43 | 64.55 | 40.7879 | 80.85 | 198 | 71531  |
| P6004_30102015_AX02DK05-0 | 1056268 | 91.8  | 76.31 | 47.6295 | 80.78 | 156 | 138080 |
| P6604_17022016_AX02DK05-0 | 459481  | 87.19 | 65.5  | 19.407  | 80.78 | 178 | 84561  |
| P6604_25012007_AX03DK15-0 | 493397  | 87.69 | 70.78 | 19.7344 | 79.32 | 223 | 78447  |
| P6804_08032006_AX03DK15-0 | 1018439 | 89.75 | 75.94 | 42.9768 | 79.32 | 304 | 108018 |
| P8104_29042011_AX02DK10-0 | 1266695 | 90.32 | 62.94 | 45.2698 | NA    | 185 | 101894 |
| P8404_11122013_AX03DK24-0 | 683978  | 68.4  | 54.39 | 26.925  | 83.38 | 175 | 114190 |
| P8404_11122013_AX03DK24-1 | 1303761 | 83.88 | 63.1  | 47.9031 | 83.38 | 148 | 132577 |
| P8404_13022014_AX03DK24-0 | 1307025 | 82.15 | 64.8  | 50.6423 | 83.38 | 120 | 117081 |
| P8504_05012016_AX02DK02-0 | 941910  | 89.11 | 71.38 | 43.5086 | 89.14 | 222 | 121959 |
| P8504_05012016_AX02DK02-1 | 736226  | 89.53 | 64.43 | 34.5314 | 89.14 | 152 | 98857  |
| P9704_12082016_AX03DK25-0 | 876563  | 92.2  | 81.77 | 39.1596 | NA    | 123 | 147550 |
| P9704_29072010_AX02DK01-0 | 997031  | 90.89 | 76.85 | 44.9791 | NA    | 195 | 91010  |
| P1705_21052013_AX01DK01-0 | 1278632 | 80.07 | 60.35 | 57.4422 | 80.85 | 241 | 88276  |
| P1705_25012010_AX01DK01-0 | 626179  | 80.01 | 64.99 | 28.742  | 80.85 | 280 | 61198  |
| P1705_30032007_AX01DK01-0 | 467709  | 84.53 | 59.21 | 21.3413 | 80.85 | 240 | 52853  |
| P2005_03022017_AX02DK04-0 | 989926  | 72.47 | 48.05 | 38.126  | NA    | 364 | 69143  |
| P2605_06072016_AX03DK26-0 | 654352  | 93.53 | 79.73 | 32.3912 | NA    | 128 | 140329 |
| P8605_01062016_AX03DK04-0 | 1235358 | 90.7  | 74.76 | 56.1584 | 85.59 | 127 | 125201 |
| P8605_07052018_AX03DK04-0 | 746743  | 89.08 | 57.38 | 31.3722 | 85.59 | 244 | 97497  |
| P0610_14092016_AX03DK27-0 | 900398  | 89.84 | 73.11 | 40.775  | 86.23 | 159 | 106137 |
| P0610_26012012_AX03DK27-0 | 987659  | 89.52 | 73.67 | 43.6624 | 86.23 | 145 | 107606 |
| P5611_13012017_AX03DK28-0 | 1176229 | 89.23 | 71.68 | 45.3802 | NA    | 296 | 142304 |
| P8511_07042017_AX03DK29-0 | 586843  | 76.46 | 47.22 | 17.686  | NA    | 229 | 84010  |

**Table S3.** Isolate susceptibility data to 21 tested antibiotics. R—resistant to the antibiotic, I—intermediately resistant to the antibiotic, S—susceptible to the antibiotic. 1-Amoxicillin/Clavulanate; 2-Ampicillin; 3-

Aztreonam; 4-Ceftazidime; 5-Ceftriaxone; 6-Cefuroxime;7-Chloramphenicol; 8-Ciprofloxacin; 9-Colistin; 10-Imipenem; 11-Meropenem; 12-Moxifloxacin; 13-Penicillin; 14- Piperacillin/Tazobactam; 15-Rifampicin; 16-Sulfonamide; 17-Tetracycline; 18-Tigecycline; 19- Tobramycin; 20-Trimethoprim; 21-Trimethoprim/sulfamethoxazole.

| Isolate number            | Species                | 1 | 2 | 3 | 4 | 5 | 6 | 7  | 8 | 9 | 10 | 11 | 12 | 13 | 14 | 15 | 16 | 17 | 18 | 19 | 20 | 21 |
|---------------------------|------------------------|---|---|---|---|---|---|----|---|---|----|----|----|----|----|----|----|----|----|----|----|----|
| P1700-04112013-AX03DK01-0 | <i>A. xylosoxidans</i> | S | I | R | I | R | R | S  | R | S | S  | S  | R  | R  | S  | R  | S  | R  | R  | R  | R  | S  |
| P0802-04042005-AX02DK07-0 | <i>A. insuavis</i>     | R | R | R | R | R | R | I  | R | R | S  | R  | R  | R  | S  | NA | S  | S  | NA | R  | R  | S  |
| P0802-18012008-AX02DK07-0 | <i>A. insuavis</i>     | I | R | R | R | R | R | S  | R | R | S  | S  | R  | R  | I  | R  | S  | S  | I  | R  | R  | S  |
| P2202-04012011-AX04DK01-0 | <i>New genotype</i>    | I | S | R | S | I | R | S  | I | S | S  | S  | I  | R  | S  | I  | S  | S  | S  | R  | R  | S  |
| P6402-27032017-AX03DK02-0 | <i>A. xylosoxidans</i> | R | R | R | I | R | R | R  | I | I | S  | S  | R  | R  | S  | R  | S  | R  | R  | R  | R  | S  |
| P7402-26022014-AX01DK02-0 | <i>A. ruhlandii</i>    | R | R | R | I | R | R | R  | R | I | R  | R  | R  | R  | I  | R  | R  | R  | R  | R  | R  | R  |
| P9902-01032004-AX02DK06-0 | <i>A. insuavis</i>     | R | R | R | I | R | R | S  | R | S | S  | I  | R  | R  | S  | NA | R  | R  | NA | R  | R  | I  |
| P9902-26012009-AX02DK06-0 | <i>A. insuavis</i>     | R | R | R | R | R | R | R  | R | I | S  | R  | R  | R  | S  | R  | R  | R  | R  | R  | R  | R  |
| P0603-08102003-AX02DK07-0 | <i>A. insuavis</i>     | S | R | R | R | R | R | I  | R | S | S  | S  | R  | R  | S  | NA | S  | S  | NA | R  | R  | S  |
| P0603-03012007-AX02DK07-0 | <i>A. insuavis</i>     | S | R | R | S | S | I | NA | I | I | S  | S  | I  | R  | S  | NA | S  | S  | NA | R  | R  | S  |
| P0703-23092011-AX03DK05-0 | <i>A. xylosoxidans</i> | S | R | R | S | R | R | R  | R | I | I  | S  | R  | R  | S  | R  | S  | R  | I  | R  | R  | S  |
| P0703-07082013-AX03DK02-0 | <i>A. xylosoxidans</i> | S | I | R | I | R | R | S  | I | I | S  | S  | R  | R  | S  | R  | S  | R  | R  | R  | R  | S  |
| P0803-27042007-AX03DK06-0 | <i>A. xylosoxidans</i> | I | R | R | I | R | R | NA | I | R | S  | NA | R  | R  | S  | NA | S  | R  | NA | R  | R  | S  |
| P0803-26042014-AX03DK06-0 | <i>A. xylosoxidans</i> | S | R | R | I | R | R | S  | R | R | S  | S  | R  | R  | S  | R  | S  | R  | R  | R  | R  | S  |
| P0903-06012012-AX03DK07-0 | <i>A. xylosoxidans</i> | I | I | R | I | R | R | R  | R | S | S  | S  | R  | R  | S  | R  | R  | R  | R  | R  | R  | R  |
| P1703-16032010-AX03DK08-0 | <i>A. xylosoxidans</i> | I | S | R | S | R | R | I  | I | S | S  | S  | R  | R  | S  | R  | S  | R  | R  | R  | R  | S  |
| P1903-27032006-AX03DK09-0 | <i>A. xylosoxidans</i> | I | R | R | R | R | R | NA | I | R | R  | I  | R  | R  | S  | NA | S  | R  | NA | R  | R  | S  |
| P1903-16122011-AX01DK01-0 | <i>A. ruhlandii</i>    | R | R | R | R | R | R | R  | R | R | I  | R  | R  | R  | R  | R  | R  | R  | S  | I  | R  | R  |

|                           |                        |    |   |   |   |   |   |    |   |   |    |    |    |   |   |    |   |   |    |   |   |   |
|---------------------------|------------------------|----|---|---|---|---|---|----|---|---|----|----|----|---|---|----|---|---|----|---|---|---|
| P1903-01092016-AX01DK01-0 | <i>A. ruhlandii</i>    | R  | R | R | R | R | R | R  | R | R | R  | I  | R  | R | R | R  | R | R | S  | R | R | R |
| P2103-11042016-AX03DK10-0 | <i>A. xylosoxidans</i> | S  | R | R | I | R | R | R  | I | I | S  | S  | R  | R | S | R  | S | R | S  | R | R | S |
| P3203-07022014-AX03DK11-0 | <i>A. xylosoxidans</i> | R  | R | R | R | R | R | R  | R | R | I  | R  | R  | R | R | R  | S | R | R  | R | R | R |
| P3203-18042005-AX03DK11-0 | <i>A. xylosoxidans</i> | NA | R | R | S | R | R | R  | R | S | S  | S  | R  | R | S | NA | R | R | NA | R | R | I |
| P3203-19092012-AX03DK11-0 | <i>A. xylosoxidans</i> | R  | R | R | R | R | R | R  | R | S | S  | R  | R  | R | S | R  | R | R | S  | R | R | R |
| P3403-06102003-AX01DK01-0 | <i>A. ruhlandii</i>    | R  | R | R | R | R | R | R  | R | R | R  | R  | R  | R | S | NA | I | R | NA | R | R | R |
| P3403-27022012-AX01DK01-0 | <i>A. ruhlandii</i>    | R  | R | R | S | R | R | S  | R | S | I  | R  | R  | R | S | I  | R | S | S  | R | R | I |
| P4203-09102012-AX03DK12-0 | <i>A. xylosoxidans</i> | S  | I | R | I | R | R | I  | R | S | S  | S  | R  | R | S | R  | S | R | S  | R | R | S |
| P4203-09122014-AX01DK01-0 | <i>A. ruhlandii</i>    | R  | R | R | R | R | R | S  | R | R | R  | R  | R  | R | I | R  | S | R | S  | R | R | S |
| P4703-16022007-AX03DK13-0 | <i>A. xylosoxidans</i> | S  | R | R | S | R | R | NA | R | I | S  | NA | R  | R | S | NA | S | R | NA | R | R | S |
| P4703-18022015-AX01DK01-0 | <i>A. ruhlandii</i>    | R  | R | R | R | R | R | R  | R | R | R  | R  | R  | R | R | R  | R | R | S  | R | R | R |
| P5103-07102016-AX02DK09-0 | <i>A. insuavis</i>     | R  | R | R | I | R | R | R  | R | S | S  | S  | R  | R | S | R  | S | R | R  | R | R | S |
| P5303-14012004-AX01DK01-0 | <i>A. ruhlandii</i>    | S  | R | R | S | R | R | R  | R | R | S  | S  | R  | R | S | NA | S | R | NA | R | R | S |
| P5303-14102009-AX01DK01-0 | <i>A. ruhlandii</i>    | R  | R | R | R | R | R | R  | R | R | R  | R  | R  | R | R | R  | R | R | R  | R | R | R |
| P5303-07102016-AX01DK01-0 | <i>A. ruhlandii</i>    | R  | R | R | R | R | R | R  | R | R | R  | R  | R  | R | I | R  | R | R | S  | R | R | R |
| P5803-17012011-AX03DK14-0 | <i>A. xylosoxidans</i> | I  | R | R | S | R | R | R  | R | I | S  | S  | R  | R | S | R  | S | R | S  | R | R | S |
| P6203-02102006-AX03DK16-0 | <i>A. xylosoxidans</i> | I  | R | R | S | R | R | NA | I | I | I  | S  | R  | R | S | NA | S | R | NA | R | R | S |
| P6203-12122015-AX02DK08-0 | <i>A. insuavis</i>     | R  | R | R | I | R | R | S  | I | S | S  | S  | R  | R | S | R  | S | S | S  | R | R | S |
| P6203-24092018-AX02DK07-0 | <i>A. insuavis</i>     | S  | R | R | R | R | R | R  | R | S | NA | S  | NA | R | S | R  | S | S | S  | R | R | S |
| P7603-19112008-AX03DK16-0 | <i>A. xylosoxidans</i> | S  | R | R | S | R | R | S  | I | S | R  | S  | R  | R | S | I  | S | R | R  | R | R | S |

|                           |                        |   |   |   |   |    |   |    |   |   |    |   |    |   |   |    |   |   |    |   |   |   |
|---------------------------|------------------------|---|---|---|---|----|---|----|---|---|----|---|----|---|---|----|---|---|----|---|---|---|
| P7603-18022011-AX03DK16-0 | <i>A. xylosoxidans</i> | I | R | R | I | R  | R | I  | I | I | I  | S | R  | R | S | R  | S | R | S  | R | R | S |
| P7603-04042014-AX03DK16-0 | <i>A. xylosoxidans</i> | R | R | R | R | R  | R | S  | R | R | R  | R | R  | R | I | R  | S | R | R  | R | R | S |
| P7703-19012017-AX01DK01-0 | <i>A. ruhlandii</i>    | R | R | R | R | R  | R | R  | R | R | I  | R | R  | R | R | R  | R | R | S  | R | R | R |
| P7703-16032018-AX01DK01-0 | <i>A. ruhlandii</i>    | R | R | R | R | R  | R | S  | R | R | NA | R | NA | R | I | R  | R | R | S  | R | R | R |
| P8603-27082014-AX03DK17-0 | <i>A. xylosoxidans</i> | S | R | R | I | R  | R | S  | R | I | S  | S | R  | R | S | R  | S | R | S  | R | R | S |
| P8603-03072008-AX03DK17-0 | <i>A. xylosoxidans</i> | I | R | R | S | R  | R | I  | R | R | S  | S | R  | R | S | R  | S | R | I  | R | R | S |
| P8703-15032017-AX01DK01-0 | <i>A. ruhlandii</i>    | R | R | R | R | NA | R | R  | R | R | S  | I | R  | R | S | R  | R | R | S  | R | R | R |
| P9203-13122011-AX03DK18-0 | <i>A. xylosoxidans</i> | I | I | R | S | R  | R | I  | I | I | S  | S | R  | R | S | R  | S | R | S  | R | R | S |
| P9203-08042016-AX03DK18-0 | <i>A. xylosoxidans</i> | R | R | R | R | R  | R | R  | R | I | S  | S | R  | R | S | R  | S | R | R  | R | R | S |
| P9403-29092004-AX03DK19-0 | <i>A. xylosoxidans</i> | S | I | R | S | R  | R | R  | R | I | S  | S | R  | R | S | NA | S | R | NA | R | R | S |
| P9403-30102009-AX03DK19-0 | <i>A. xylosoxidans</i> | I | R | R | S | R  | R | I  | I | S | S  | S | R  | R | S | R  | S | R | S  | R | R | S |
| P9403-05092016-AX03DK19-0 | <i>A. xylosoxidans</i> | R | R | R | R | R  | R | R  | R | R | S  | I | R  | R | I | R  | S | R | S  | R | R | S |
| P9503-02012007-AX01DK01-0 | <i>A. ruhlandii</i>    | R | R | R | I | R  | R | NA | R | R | R  | R | R  | R | R | NA | S | R | NA | R | R | S |
| P9503-04032011-AX01DK01-0 | <i>A. ruhlandii</i>    | R | R | R | R | R  | R | R  | R | R | R  | R | R  | R | R | R  | I | R | R  | R | R | S |
| P9503-27052014-AX01DK01-0 | <i>A. ruhlandii</i>    | R | R | R | R | R  | R | R  | R | R | R  | R | R  | R | R | R  | R | R | R  | R | R | R |
| P9603-28102003-AX01DK01-0 | <i>A. ruhlandii</i>    | S | R | R | R | R  | R | R  | R | S | S  | S | R  | R | R | NA | S | R | NA | R | R | S |
| P9603-28112008-AX01DK01-0 | <i>A. ruhlandii</i>    | R | R | R | R | R  | R | R  | R | R | R  | R | R  | R | I | R  | S | R | R  | R | R | S |
| P9603-01042014-AX01DK01-0 | <i>A. ruhlandii</i>    | R | R | R | R | R  | R | R  | R | R | R  | R | R  | R | I | R  | R | R | R  | R | R | R |
| P0604-30122003-AX03DK20-0 | <i>A. xylosoxidans</i> | S | S | R | S | R  | R | I  | R | S | S  | S | R  | R | S | NA | S | R | NA | R | R | S |
| P1704-07022011-AX03DK21-0 | <i>A. xylosoxidans</i> | R | R | R | I | R  | R | I  | R | R | S  | S | R  | R | S | R  | S | R | R  | S | R | S |



|                           |                        |   |   |   |   |   |   |    |   |   |   |    |   |   |   |    |   |   |    |   |   |   |
|---------------------------|------------------------|---|---|---|---|---|---|----|---|---|---|----|---|---|---|----|---|---|----|---|---|---|
| P3004-24042007-AX03DK22-0 | <i>A. xylosoxidans</i> | S | I | R | S | R | R | NA | I | I | S | NA | R | R | S | NA | S | R | NA | R | R | S |
| P3504-20122013-AX03DK23-0 | <i>A. xylosoxidans</i> | S | I | R | I | R | R | R  | R | I | S | S  | R | R | S | R  | S | R | S  | R | R | S |
| P3504-09012015-AX03DK23-0 | <i>A. xylosoxidans</i> | S | I | R | I | R | R | R  | R | R | S | S  | R | R | S | R  | S | R | S  | R | R | S |
| P3704-26112003-AX01DK01-0 | <i>A. ruhlandii</i>    | S | R | R | R | R | R | R  | R | R | S | S  | R | R | S | NA | R | R | NA | R | R | I |
| P3704-08022008-AX01DK01-0 | <i>A. ruhlandii</i>    | R | R | R | R | R | R | R  | R | R | R | R  | R | R | R | R  | R | R | R  | R | R | R |
| P3704-27062014-AX01DK01-0 | <i>A. ruhlandii</i>    | R | R | R | R | R | R | R  | R | R | R | R  | R | R | R | R  | R | R | R  | R | R | R |
| P4104-02122014-AX01DK03-0 | <i>A. ruhlandii</i>    | S | R | R | I | R | R | R  | S | S | S | S  | R | R | S | R  | S | R | R  | R | R | S |
| P5204-15082016-AX03DK03-0 | <i>A. xylosoxidans</i> | S | R | R | I | R | R | R  | I | I | S | S  | R | R | S | R  | S | R | S  | R | R | S |
| P5604-28082007-AX01DK01-0 | <i>A. ruhlandii</i>    | S | R | R | R | R | R | NA | R | R | S | S  | R | R | S | NA | R | R | NA | R | R | R |
| P5604-07102016-AX01DK01-0 | <i>A. ruhlandii</i>    | R | R | R | R | R | R | R  | R | R | R | R  | R | R | R | R  | R | R | S  | R | R | R |
| P6004-19062007-AX01DK01-0 | <i>A. ruhlandii</i>    | R | R | R | R | R | R | NA | R | R | R | R  | R | R | R | NA | S | R | NA | R | R | S |
| P6004-30102015-AX02DK05-0 | <i>A. insuavis</i>     | R | R | R | R | R | R | R  | R | R | R | R  | R | R | R | R  | R | R | R  | R | R | R |
| P6604-25012007-AX03DK15-0 | <i>A. xylosoxidans</i> | I | R | R | S | R | R | NA | R | S | S | NA | R | R | S | NA | S | R | NA | R | R | S |
| P6604-17022016-AX02DK05-0 | <i>A. insuavis</i>     | I | R | R | R | R | R | R  | I | S | S | S  | R | R | S | R  | S | S | S  | R | R | S |
| P6804-08032006-AX03DK15-0 | <i>A. xylosoxidans</i> | I | R | R | S | R | R | NA | R | I | S | S  | R | R | S | NA | S | R | NA | R | R | S |
| P8104-29042011-AX02DK10-0 | <i>A. insuavis</i>     | I | R | R | I | R | R | R  | I | S | S | S  | R | R | S | R  | S | S | R  | R | I | S |
| P8404-11122013-AX03DK24-0 | <i>A. xylosoxidans</i> | S | I | R | R | R | R | R  | R | I | S | S  | R | R | S | R  | S | R | R  | R | R | S |
| P8404-11122013-AX03DK24-1 | <i>A. xylosoxidans</i> | S | I | R | R | R | R | R  | R | I | S | S  | R | R | S | R  | S | R | R  | R | R | S |
| P8404-13022014-AX03DK24-0 | <i>A. xylosoxidans</i> | S | S | R | R | R | R | R  | R | I | S | I  | R | R | S | R  | S | R | R  | R | R | S |
| P8504-05012016-AX02DK02-0 | <i>A. insuavis</i>     | R | R | R | R | R | R | R  | I | S | S | S  | R | R | S | R  | S | R | R  | R | R | S |

|                           |                        |    |    |   |   |    |    |    |   |   |    |    |    |    |   |    |    |    |    |    |   |    |    |
|---------------------------|------------------------|----|----|---|---|----|----|----|---|---|----|----|----|----|---|----|----|----|----|----|---|----|----|
| P8504-05012016-AX02DK02-1 | <i>A. insuavis</i>     | R  | R  | R | R | R  | R  | R  | R | I | S  | S  | S  | R  | R | S  | R  | S  | R  | R  | R | R  | S  |
| P9704-12082016-AX03DK25-0 | <i>A. xylosoxidans</i> | I  | I  | R | S | R  | R  | R  | R | R | R  | S  | S  | R  | R | S  | R  | S  | R  | S  | R | R  | S  |
| P9704-29072010-AX02DK01-1 | <i>A. insuavis</i>     | NA | NA | R | I | NA | NA | NA | I | S | S  | S  | R  | NA | S | NA | NA | NA | NA | NA | R | NA | NA |
| P1705-30032007-AX01DK01-0 | <i>A. ruhlandii</i>    | R  | R  | R | R | R  | R  | NA | R | R | R  | NA | R  | R  | R | NA | R  | R  | NA | R  | R | R  | I  |
| P1705-25012010-AX01DK01-0 | <i>A. ruhlandii</i>    | R  | R  | R | R | R  | R  | R  | R | R | R  | R  | R  | R  | R | S  | R  | R  | R  | R  | R | R  | R  |
| P1705-21052013-AX01DK01-0 | <i>A. ruhlandii</i>    | R  | R  | R | R | R  | R  | R  | R | R | R  | R  | R  | R  | R | I  | R  | R  | R  | S  | R | R  | R  |
| P2005-03022017-AX02DK04-0 | <i>A. insuavis</i>     | R  | R  | R | R | R  | R  | R  | R | S | I  | R  | R  | R  | R | R  | R  | R  | S  | R  | R | R  | R  |
| P2605-06072016-AX03DK26-0 | <i>A. xylosoxidans</i> | S  | R  | R | I | R  | R  | R  | R | I | S  | S  | R  | R  | S | R  | S  | R  | R  | R  | R | R  | S  |
| P8605-01062016-AX03DK04-0 | <i>A. xylosoxidans</i> | R  | R  | R | I | R  | R  | R  | R | S | S  | S  | R  | R  | S | R  | S  | R  | S  | R  | R | R  | S  |
| P8605-07052018-AX03DK04-0 | <i>A. xylosoxidans</i> | I  | R  | R | I | R  | R  | R  | R | S | NA | S  | NA | R  | S | R  | S  | R  | S  | R  | R | R  | S  |
| P0610-26012012-AX03DK27-0 | <i>A. xylosoxidans</i> | R  | R  | R | I | R  | R  | R  | R | R | S  | I  | R  | R  | I | R  | S  | R  | R  | R  | R | R  | S  |
| P0610-14092016-AX03DK27-0 | <i>A. xylosoxidans</i> | R  | R  | R | R | R  | R  | R  | R | R | S  | R  | R  | R  | R | R  | R  | R  | S  | R  | R | R  | R  |
| P5611-13012017-AX03DK28-0 | <i>A. xylosoxidans</i> | S  | R  | R | I | R  | R  | R  | R | I | S  | S  | R  | R  | S | R  | S  | R  | S  | R  | R | R  | S  |
| P8511-07042017-AX03DK29-0 | <i>A. xylosoxidans</i> | I  | R  | R | I | R  | R  | S  | I | S | S  | S  | R  | R  | S | R  | S  | R  | S  | R  | R | R  | S  |

**Table S4.** MLST profiles of 101 *Achromobacter* isolates.

| Sample                    | Clone type | ST  |
|---------------------------|------------|-----|
| P1903_01092016_AX01DK01-0 | AX01DK01   | 385 |
| P1903_16122011_AX01DK01-0 | AX01DK01   | 385 |
| P3403_06102003_AX01DK01-0 | AX01DK01   | 385 |
| P3403_27022012_AX01DK01-0 | AX01DK01   | -   |
| P4203_09122014_AX01DK01-0 | AX01DK01   | 385 |
| P4703_18022015_AX01DK01-0 | AX01DK01   | 385 |
| P5303_07102016_AX01DK01-0 | AX01DK01   | 385 |
| P5303_14012004_AX01DK01-0 | AX01DK01   | -   |
| P5303_14102009_AX01DK01-0 | AX01DK01   | 385 |

|                           |          |     |
|---------------------------|----------|-----|
| P7703_16032018_AX01DK01-0 | AX01DK01 | 385 |
| P7703_19012017_AX01DK01-0 | AX01DK01 | 385 |
| P8703_15032017_AX01DK01-0 | AX01DK01 | 385 |
| P9503_02012007_AX01DK01-0 | AX01DK01 | 385 |
| P9503_04032011_AX01DK01-0 | AX01DK01 | 385 |
| P9503_27052014_AX01DK01-0 | AX01DK01 | 385 |
| P9603_01042014_AX01DK01-0 | AX01DK01 | 385 |
| P9603_28102003_AX01DK01-0 | AX01DK01 | 385 |
| P9603_28112008_AX01DK01-0 | AX01DK01 | 385 |
| P3704_08022008_AX01DK01-0 | AX01DK01 | 385 |
| P3704_26112003_AX01DK01-0 | AX01DK01 | 385 |
| P3704_27062014_AX01DK01-0 | AX01DK01 | 385 |
| P5604_07102016_AX01DK01-0 | AX01DK01 | -   |
| P5604_28082007_AX01DK01-0 | AX01DK01 | 385 |
| P6004_19062007_AX01DK01-0 | AX01DK01 | 385 |
| P1705_21052013_AX01DK01-0 | AX01DK01 | -   |
| P1705_25012010_AX01DK01-0 | AX01DK01 | 385 |
| P1705_30032007_AX01DK01-0 | AX01DK01 | -   |
| P7402_26022014_AX01DK02-0 | AX01DK02 | -   |
| P4104_02122014_AX01DK03-0 | AX01DK03 | -   |
| P9704_29072010_AX02DK01-0 | AX02DK01 | -   |
| P8504_05012016_AX02DK02-0 | AX02DK02 | -   |
| P8504_05012016_AX02DK02-1 | AX02DK02 | -   |
| P9203_01012000_AX02DK03-0 | AX02DK03 | -   |
| P2005_03022017_AX02DK04-0 | AX02DK04 | -   |
| P6004_30102015_AX02DK05-0 | AX02DK05 | -   |
| P6604_17022016_AX02DK05-0 | AX02DK05 | -   |
| P9902_01011996_AX02DK06-0 | AX02DK06 | -   |
| P9902_01032004_AX02DK06-0 | AX02DK06 | -   |
| P9902_26012009_AX02DK06-0 | AX02DK06 | -   |
| P0802_04042005_AX02DK07-0 | AX02DK07 | 144 |
| P0802_18012008_AX02DK07-0 | AX02DK07 | 144 |
| P0603_03012007_AX02DK07-0 | AX02DK07 | 144 |
| P0603_08102003_AX02DK07-0 | AX02DK07 | 144 |
| P6203_24092018_AX02DK07-0 | AX02DK07 | 144 |
| P6203_12122015_AX02DK08-0 | AX02DK08 | -   |
| P5103_07102016_AX02DK09-0 | AX02DK09 | -   |
| P8104_29042011_AX02DK10-0 | AX02DK10 | 218 |
| P1700_04112013_AX03DK01-0 | AX03DK01 | 5   |
| P6402_27032017_AX03DK02-0 | AX03DK02 | 11  |
| P0703_07082013_AX03DK02-0 | AX03DK02 | 11  |
| P5204_15082016_AX03DK03-0 | AX03DK03 | -   |
| P8605_01062016_AX03DK04-0 | AX03DK04 | -   |
| P8605_07052018_AX03DK04-0 | AX03DK04 | -   |
| P0703_23092011_AX03DK05-0 | AX03DK05 | -   |
| P0803_01012000_AX03DK06-0 | AX03DK06 | 326 |

|                           |          |     |
|---------------------------|----------|-----|
| P0803_26042014_AX03DK06-0 | AX03DK06 | 326 |
| P0803_27042007_AX03DK06-0 | AX03DK06 | 326 |
| P0903_06012012_AX03DK07-0 | AX03DK07 | 201 |
| P1703_16032010_AX03DK08-0 | AX03DK08 | -   |
| P1903_01011996_AX03DK09-0 | AX03DK09 | 426 |
| P1903_27032006_AX03DK09-0 | AX03DK09 | 426 |
| P2103_11042016_AX03DK10-0 | AX03DK10 | 184 |
| P3203_01011997_AX03DK11-0 | AX03DK11 | 228 |
| P3203_07022014_AX03DK11-0 | AX03DK11 | 228 |
| P3203_18042005_AX03DK11-0 | AX03DK11 | -   |
| P3203_19092012_AX03DK11-0 | AX03DK11 | 228 |
| P4203_09102012_AX03DK12-0 | AX03DK12 | -   |
| P4703_01012000_AX03DK13-0 | AX03DK13 | -   |
| P4703_16022007_AX03DK13-0 | AX03DK13 | -   |
| P5803_17012011_AX03DK14-0 | AX03DK14 | 387 |
| P6203_01012000_AX03DK15-0 | AX03DK15 | 27  |
| P6604_25012007_AX03DK15-0 | AX03DK15 | 27  |
| P6804_08032006_AX03DK15-0 | AX03DK15 | -   |
| P6203_02102006_AX03DK16-0 | AX03DK16 | 182 |
| P7603_04042014_AX03DK16-0 | AX03DK16 | 182 |
| P7603_18022011_AX03DK16-0 | AX03DK16 | 182 |
| P7603_19112008_AX03DK16-0 | AX03DK16 | 182 |
| P8603_03072008_AX03DK17-0 | AX03DK17 | 184 |
| P8603_27082014_AX03DK17-0 | AX03DK17 | -   |
| P9203_08042016_AX03DK18-0 | AX03DK18 | -   |
| P9203_13122011_AX03DK18-0 | AX03DK18 | -   |
| P9403_05092016_AX03DK19-0 | AX03DK19 | 237 |
| P9403_29092004_AX03DK19-0 | AX03DK19 | 237 |
| P9403_30102009_AX03DK19-0 | AX03DK19 | 237 |
| P0604_30122003_AX03DK20-0 | AX03DK20 | -   |
| P1704_01011999_AX03DK21-0 | AX03DK21 | 200 |
| P1704_07022011_AX03DK21-0 | AX03DK21 | 200 |
| P3004_24042007_AX03DK22-0 | AX03DK22 | -   |
| P3504_09012015_AX03DK23-0 | AX03DK23 | 282 |
| P3504_20122013_AX03DK23-0 | AX03DK23 | 282 |
| P8404_11122013_AX03DK24-0 | AX03DK24 | 175 |
| P8404_11122013_AX03DK24-1 | AX03DK24 | 175 |
| P8404_13022014_AX03DK24-0 | AX03DK24 | 175 |
| P9704_12082016_AX03DK25-0 | AX03DK25 | 153 |
| P2605_06072016_AX03DK26-0 | AX03DK26 | -   |
| P0610_14092016_AX03DK27-0 | AX03DK27 | -   |
| P0610_26012012_AX03DK27-0 | AX03DK27 | -   |
| P5611_13012017_AX03DK28-0 | AX03DK28 | -   |
| P8511_07042017_AX03DK29-0 | AX03DK29 | -   |
| P2202_04012011_AX04DK01-0 | AX04DK01 | -   |
| P7603_01011997_AX04DK02-0 | AX04DK02 | -   |

**Table S5.** Suspected transmission cases with clinic visitation overlap information and comments whether the epidemiological data supports the transmission.

| Patient 1 | Patient 2 | Clone type | Total contact dates | Time period | Date of first contact | Date of last contact | First isolate of the transmitted clone type |           | Support for transmission                                                                                                             |
|-----------|-----------|------------|---------------------|-------------|-----------------------|----------------------|---------------------------------------------|-----------|--------------------------------------------------------------------------------------------------------------------------------------|
|           |           |            |                     |             |                       |                      | Patient 1                                   | Patient 2 |                                                                                                                                      |
| P1903     | P7703     | AX01DK01   | 2                   | 0.5         | 2015.9                | 2016.4               | 2016.3                                      | 2017.1    | Yes, exposure before known colonization of Patient 2                                                                                 |
| P6402     | P0703     | AX03DK02   | 2                   | 0.1         | 2018.6                | 2018.7               | 2017.2                                      | 2011.7    | No, contact occurs after colonization                                                                                                |
| P6203     | P7603     | AX03DK16   | 2                   | 3.7         | 2011.2                | 2014.9               | 2006.8                                      | 2008.9    | No, contact occurs after colonization                                                                                                |
| P4203     | P3704     | AX01DK01   | 6                   | 3.5         | 2013.4                | 2016.9               | 2014.9                                      | 2003.9    | Yes, exposure before known colonization of Patient 1                                                                                 |
| P6203     | P6604     | AX03DK15   | 7                   | 11.4        | 2005.9                | 2017.3               | 2000.0                                      | 2007.1    | Yes, exposure before known colonization of Patient 2                                                                                 |
| P0802     | P0603     | AX02DK07   | 7                   | 3.8         | 2003.9                | 2007.7               | 2005.3                                      | 2003.8    | Yes, exposure before known colonization of Patient 1                                                                                 |
| P4703     | P3704     | AX01DK01   | 8                   | 8.7         | 2003.7                | 2012.4               | 2015.1                                      | 2003.9    | Yes, exposure before known colonization of Patient 1                                                                                 |
| P6004     | P1705     | AX01DK01   | 10                  | 3.2         | 2007.5                | 2010.7               | 2007.5                                      | 2007.2    | No, patient contact on the day of clone type detection                                                                               |
| P6604     | P6804     | AX03DK15   | 10                  | 5.8         | 2006.8                | 2012.6               | 2007.1                                      | 2006.2    | Yes, patient contact before colonization of Patient 1                                                                                |
| P0603     | P6203     | AX02DK07   | 14                  | 13.4        | 2005.4                | 2018.8               | 2003.8                                      | 2018.7    | Yes, exposure before known colonization of Patient 2                                                                                 |
| P6004     | P6604     | AX02DK05   | 13                  | 11.8        | 2005.9                | 2017.7               | 2015.8                                      | 2016.1    | Yes, exposure before known colonization of Patient 2                                                                                 |
| PP5303    | P3704     | AX01DK01   | 20                  | 16          | 2002.9                | 2018.9               | 2004.0                                      | 2003.9    | Yes, exposure before known colonization of Patient 1                                                                                 |
| P9503     | P9603     | AX01DK01   | 55                  | 11.7        | 2005                  | 2016.7               | 2007.0                                      | 2003.8    | Yes, exposure before known colonization of Patient 1. Patients are siblings, thus transmission in the household has likely occurred. |
| P8703     | P1705     | AX01DK01   | 0                   | -           | -                     | -                    | 2017.2                                      | 2007.2    | No, no contact between patients                                                                                                      |
| P3403     | PP5303    | AX01DK01   | 8                   | 7.4         | 2002.1                | 2009.5               | 2003.8                                      | 2004.0    | Yes, patient contact before colonization of Patient 2                                                                                |
| P5604     | P1903     | AX01DK01   | 5                   | 4.4         | 2005.8                | 2010.2               | 2007.7                                      | 2016.3    | Yes, patient contact before colonization of Patient 2                                                                                |

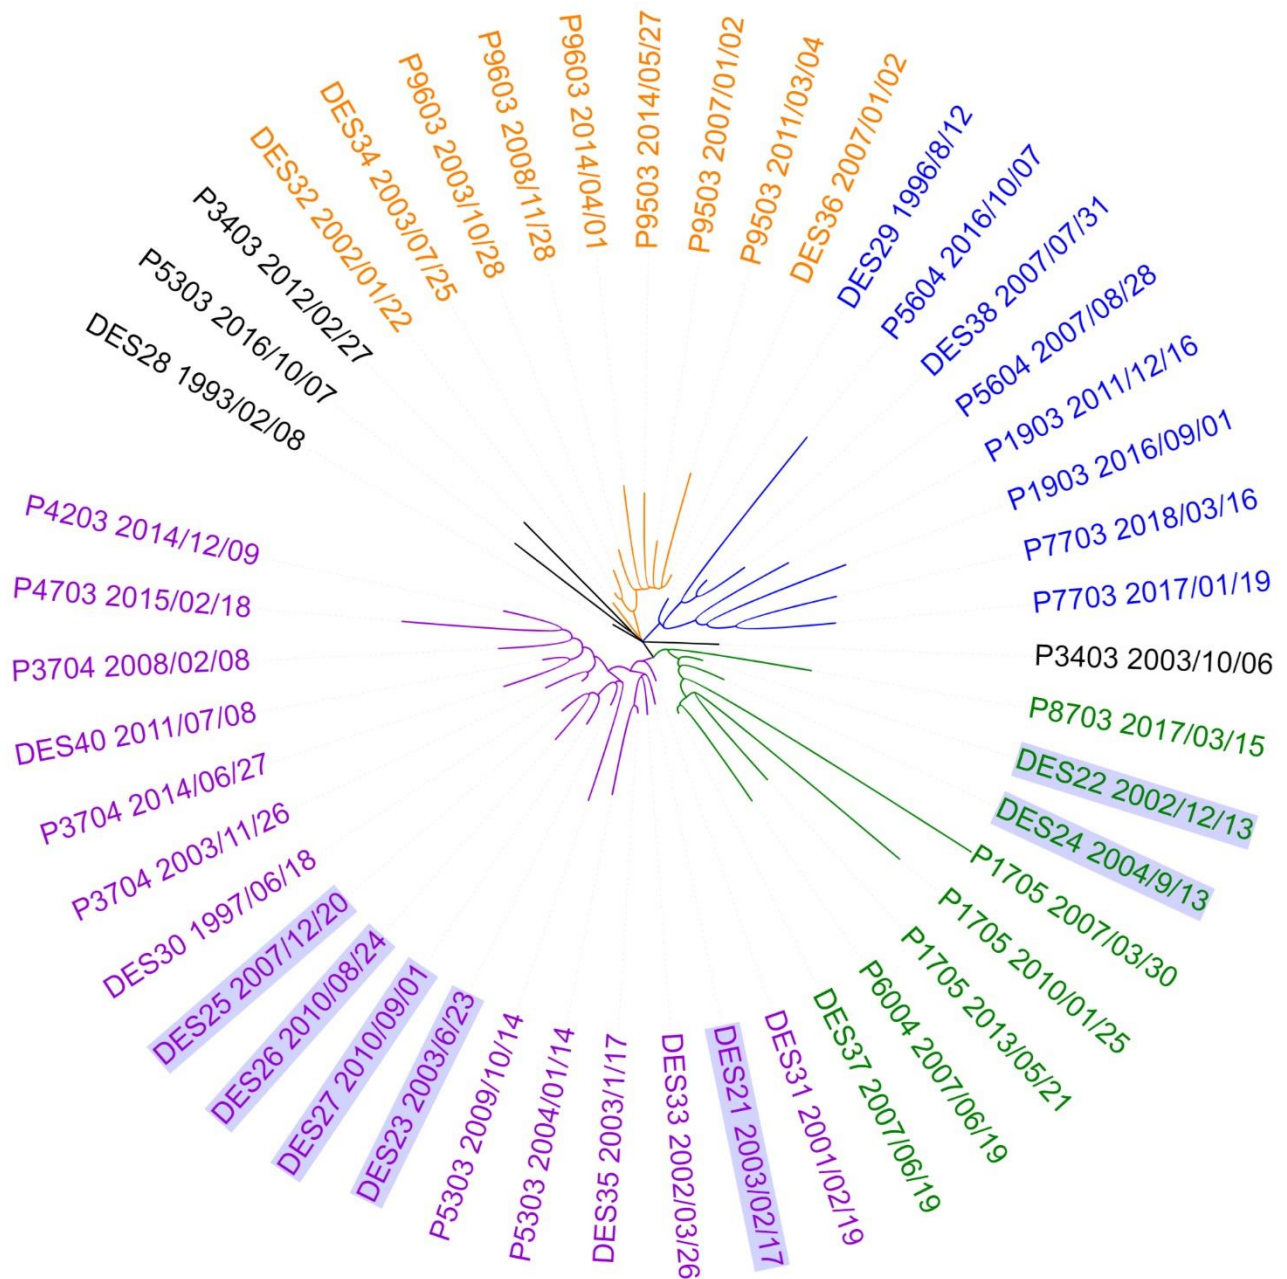

**Figure S1.** Core genome SNV-based phylogenetic tree from *de novo* assembled DES isolates of which 7 were from patients attending CF center in Aarhus (blue label background; (10)) and 25 were from patients attending CF center in Copenhagen. The four patient clusters are separated by branch and label colors. The phylogenetic tree can be accessed on iTOL webserver: <https://itol.embl.de/tree/12807362379081584977362>.

# *A. ruhlandii*

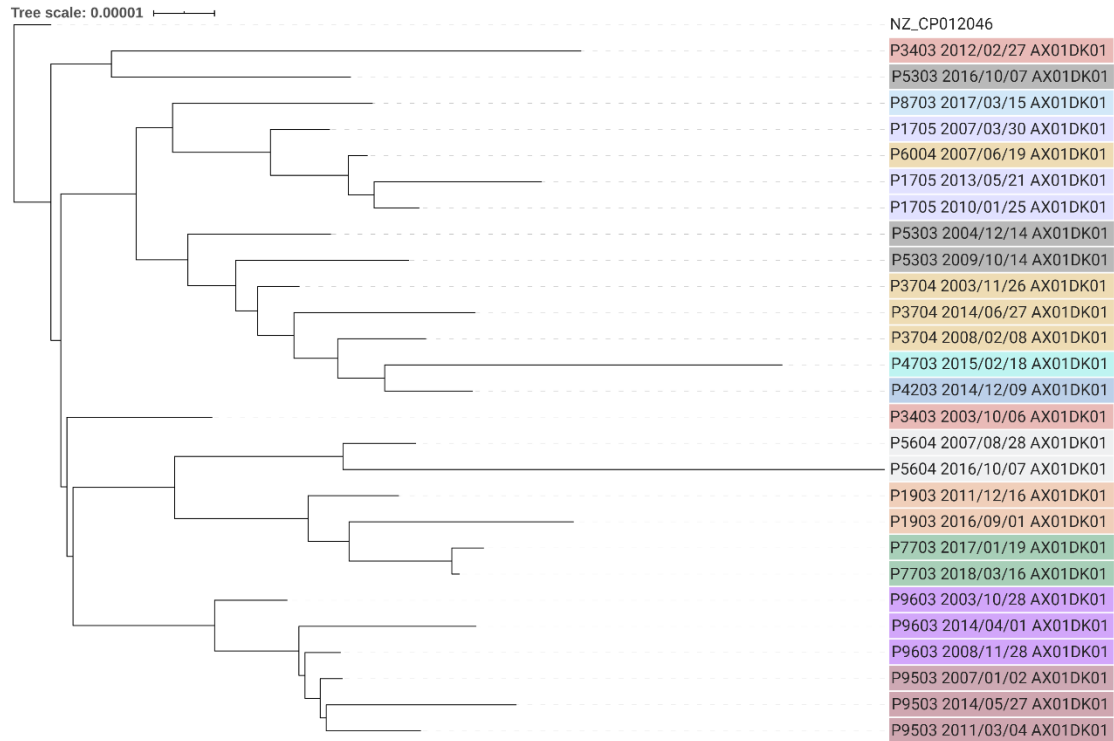

# *A. insuavis*

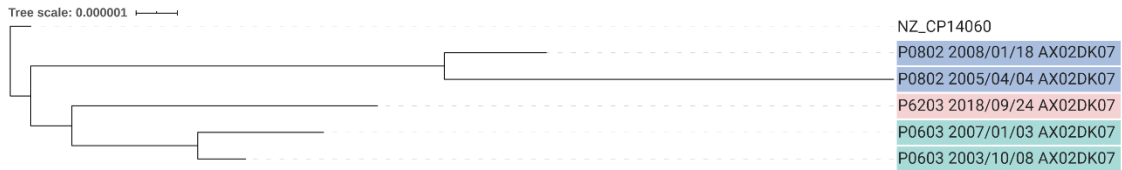

# *A. xylosoxidans*

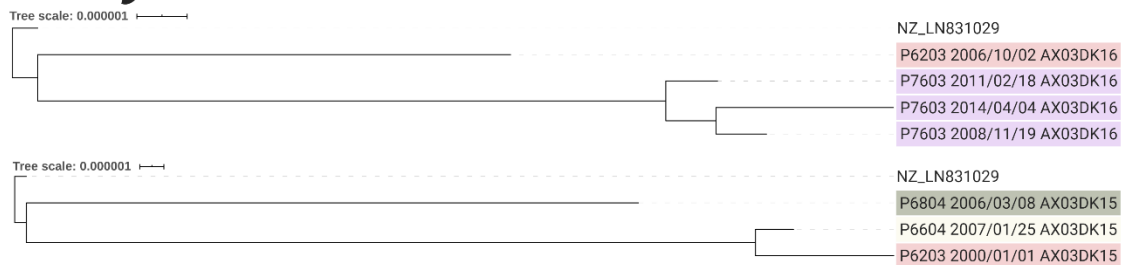

**Figure S2.** Core genome SNV phylogenetic trees of suspected bacterial isolates transmission between patients in *Achromobacter ruhlandii*, *A. insuavis*, and *A. xylosoxidans* where 4 or more isolates were available. Isolates are named as follows: [Patient ID] [Sampling date] [Species and clone type].
